# Supplementary material for: Exploring high-quality microbial genomes by assembling short-reads with long-range connectivity
Source: PubMed Central journal article supplement (PMC11143213; doi:10.1038/s41467-024-49060-z), 2024-05-31
Supplement: 41467_2024_49060_MOESM1_ESM.pdf [file 41467_2024_49060_MOESM1_ESM.pdf]

# Exploring high-quality microbial genomes by assembling short-reads with long-range connectivity

Table of Contents

|                                                                                                                    |    |
|--------------------------------------------------------------------------------------------------------------------|----|
| <b>Supplementary Figures</b> .....                                                                                 | 2  |
| <b>Supplementary Tables</b> .....                                                                                  | 8  |
| <b>Supplementary Notes</b> .....                                                                                   | 12 |
| Supplementary Note 1: 10x, stLFR and TELL-Seq Sequencing .....                                                     | 12 |
| Supplementary Note 2: Read binning of Pangaea .....                                                                | 15 |
| Supplementary Note 3: Parameter search of Pangaea .....                                                            | 17 |
| Supplementary Note 4: Pangaea generated more NCMAGs using linked-reads than metaFlye using PacBio long-reads ..... | 18 |
| References .....                                                                                                   | 19 |

## Supplementary Figures

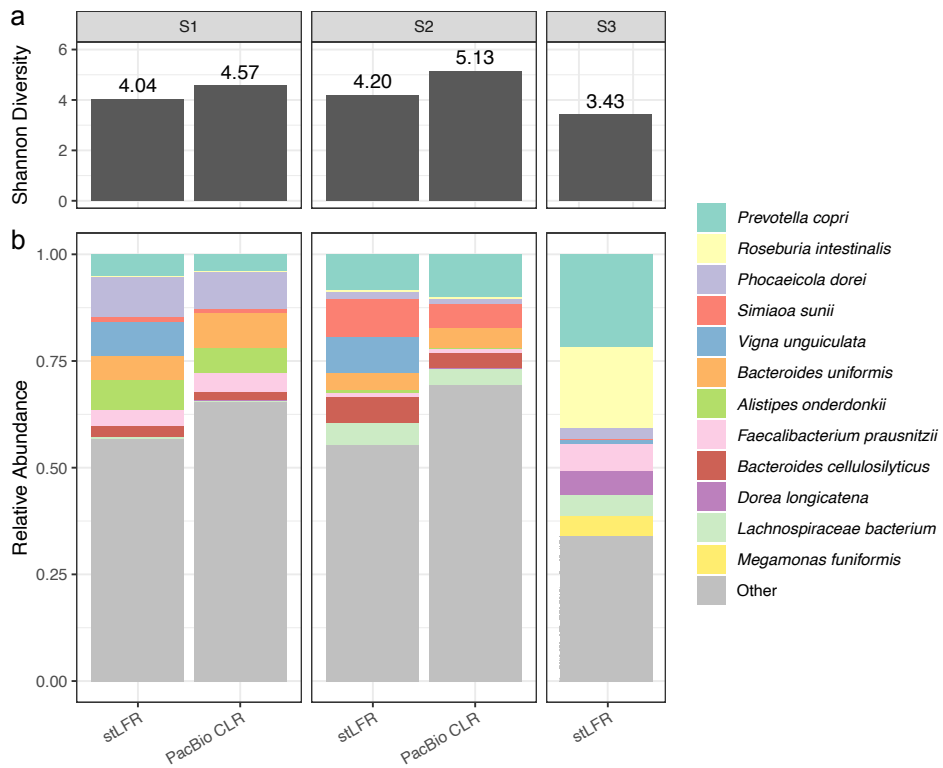

**Supplementary Figure 1.** The reads composition and Shannon diversity of sequencing data from different sequencing technologies on S1, S2, and S3. **a** Shannon diversity of stLFR linked-reads and PacBio CLR long-reads on S1, S2, and S3. **b** Reads composition of stLFR linked-reads and PacBio CLR long-reads on S1, S2, and S3. Source data are provided as a Source Data file.

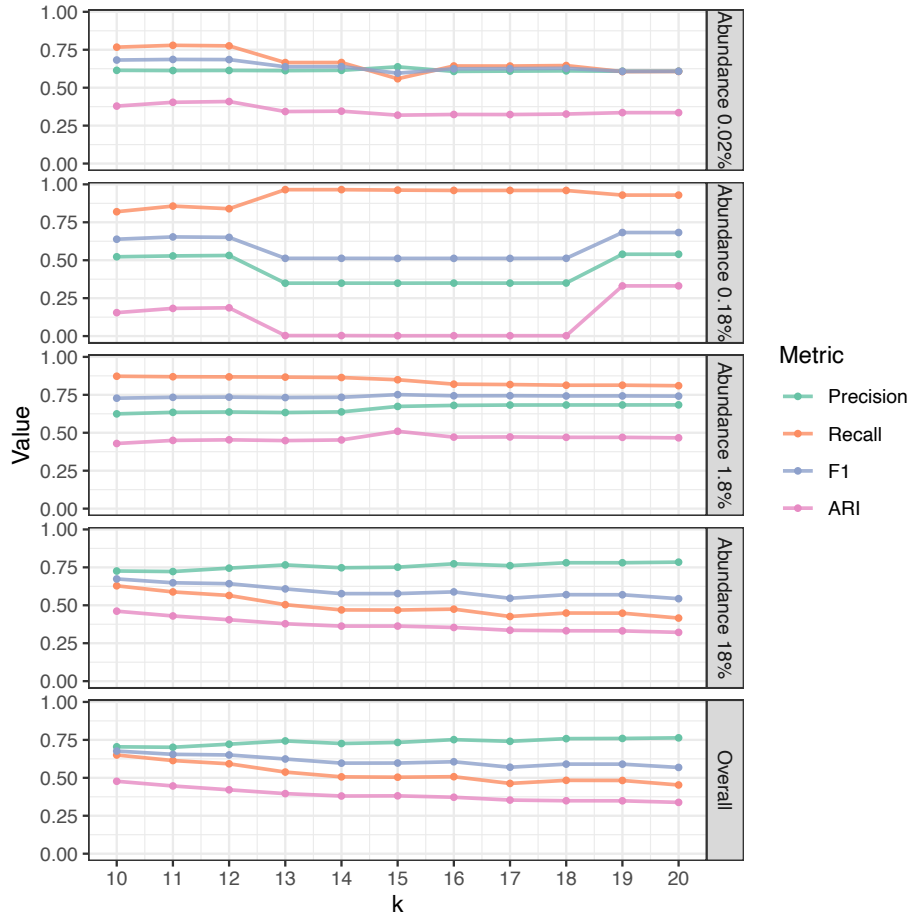

**Supplementary Figure 2.** The precision, recall, F1 score and adjusted rand index (ARI) values of the co-barcoded read binning using different numbers of clusters on the stLFR linked-reads of ATCC-MSA-1003. The results are organized by strains of different abundance levels. Source data are provided as a Source Data file.

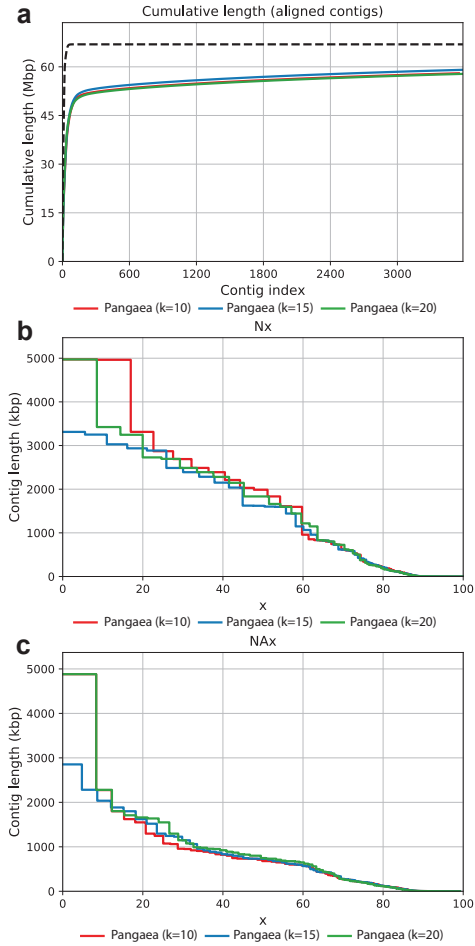

**Supplementary Figure 3.** The assembly statistics of Pangaea using different cluster numbers ( $k=10$ ,  $15$ , and  $20$ ) on stLFR linked-reads of the ATCC-MSA-1003 mock community. **a** Cumulative length of Pangaea assemblies using  $k=10$ ,  $15$ , and  $20$ . **b** Nx of Pangaea assemblies using  $k=10$ ,  $15$ , and  $20$ . **c** NAx of Pangaea assemblies using  $k=10$ ,  $15$ , and  $20$ . Source data are provided as a Source Data file.



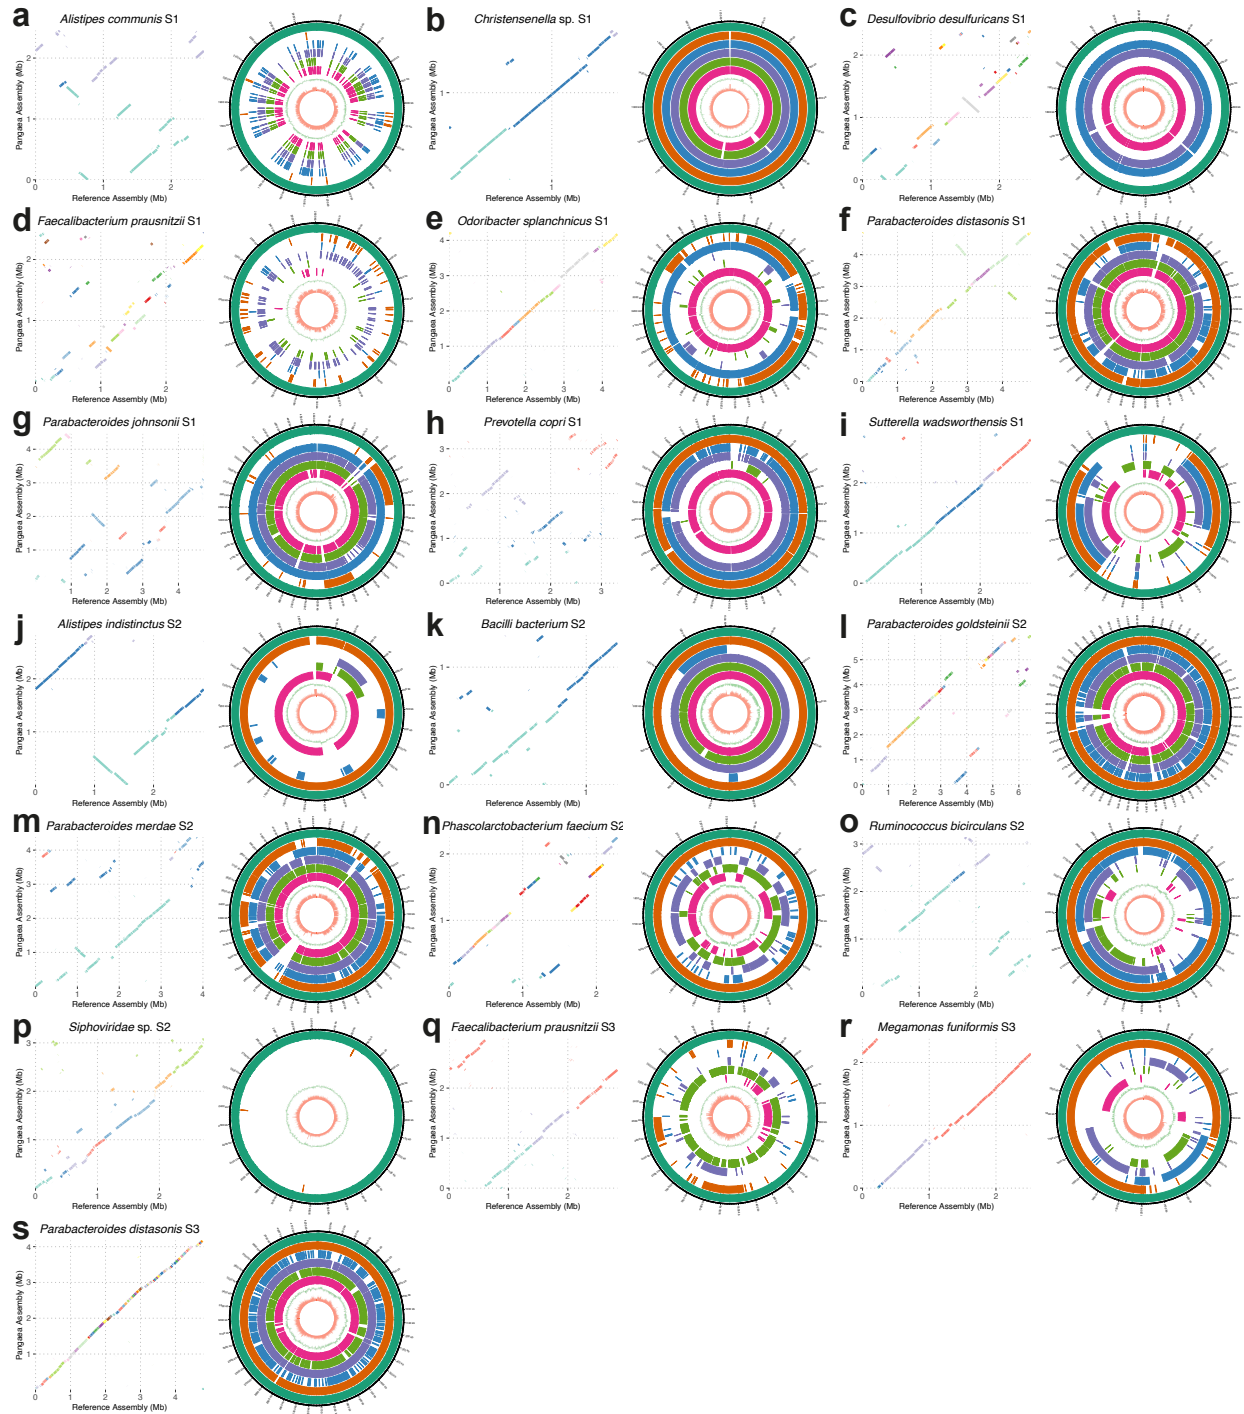

**Supplementary Figure 4.** Genome collinearity between the species-level NCMAGs produced by Pangaea (except for those shown in the main manuscript) and their closest reference genomes (dot plots), and comparison of different MAGs of the same species (circos plots). **a-i** The selected NCMAGs of Pangaea for S1. **j-p** The selected NCMAGs of Pangaea for S2. **q-s** The selected NCMAGs of Pangaea for S3. Pangaea obtained complete and circular NCMAGs for a, b and i. Concentric rings in the circos plots from outermost to innermost display Pangaea (dark green),

Athena (orange), Supernova (blue), cloudSPAdes (purple), MEGAHIT (light green), metaSPAdes (pink), GC-skew, and read depth of Pangaea MAGs, respectively. Long tick marks on the outer black circle indicate 100Kb intervals. For species with multiple MAGs from the same assembler, only the MAG with the highest N50 is shown. Source data are provided as a Source Data file.

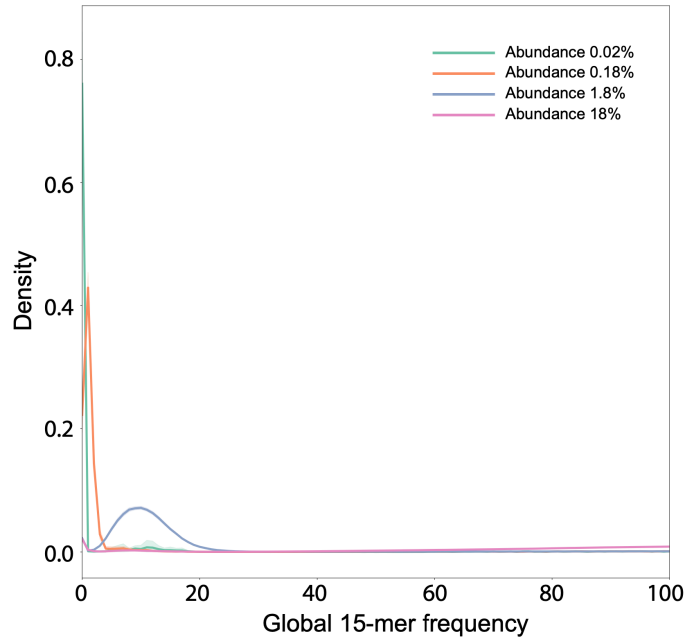

**Supplementary Figure 5.** The  $k$ -mer histograms of co-barcoded reads of different abundance levels on the stLFR linked-reads of ATCC-MSA-1003. The line for abundance 18% is truncated at the global 15-mer frequency at 100 for better visualization of the other three abundance levels.

## Supplementary Tables

**Supplementary Table 1.** The composition and taxonomy ID of the 20 strains in the ATCC-MSA-1003 mock community.

| Organism                            | ATCC ID      | Composition | Taxonomy ID      |
|-------------------------------------|--------------|-------------|------------------|
| <i>Bacteroides vulgatus</i>         | ATCC_8482    | 0.02%       | NCBI:txid435590  |
| <i>Bifidobacterium adolescentis</i> | ATCC_15703   | 0.02%       | NCBI:txid367928  |
| <i>Deinococcus radiodurans</i>      | ATCC_BAA816  | 0.02%       | NCBI:txid243230  |
| <i>Enterococcus faecalis</i>        | ATCC_47077   | 0.02%       | NCBI:txid474186  |
| <i>Schaalia odontolytica</i>        | ATCC_17982   | 0.02%       | NCBI:txid411466  |
| <i>Acinetobacter baumannii</i>      | ATCC_17978   | 0.18%       | NCBI:txid400667  |
| <i>Cutibacterium acnes</i>          | ATCC_11828   | 0.18%       | NCBI:txid1091045 |
| <i>Helicobacter pylori</i>          | ATCC_700392  | 0.18%       | NCBI:txid85962   |
| <i>Lactobacillus gasseri</i>        | ATCC_33323   | 0.18%       | NCBI:txid324831  |
| <i>Neisseria meningitidis</i>       | ATCC_BAA335  | 0.18%       | NCBI:txid122586  |
| <i>Bacillus cereus</i>              | ATCC_10987   | 1.8%        | NCBI:txid222523  |
| <i>Clostridium beijerinckii</i>     | ATCC_35702   | 1.8%        | NCBI:txid864803  |
| <i>Pseudomonas aeruginosa</i>       | ATCC_9027    | 1.8%        | NCBI:txid287     |
| <i>Staphylococcus aureus</i>        | ATCC_BAA1556 | 1.8%        | NCBI:txid451515  |
| <i>Streptococcus agalactiae</i>     | ATCC_BAA611  | 1.8%        | NCBI:txid208435  |
| <i>Escherichia coli</i>             | ATCC_700926  | 18%         | NCBI:txid511145  |
| <i>Porphyromonas gingivalis</i>     | ATCC_33277   | 18%         | NCBI:txid431947  |
| <i>Rhodobacter sphaeroides</i>      | ATCC_17029   | 18%         | NCBI:txid349101  |
| <i>Staphylococcus epidermidis</i>   | ATCC_12228   | 18%         | NCBI:txid176280  |
| <i>Streptococcus mutans</i>         | ATCC_700610  | 18%         | NCBI:txid210007  |

**Supplementary Table 2.** The sequencing statistics of all the datasets used in the manuscript.

| Microbial community       | Sequencing technology | Read length        | Total sequencing size (Gb) | Shannon diversity |
|---------------------------|-----------------------|--------------------|----------------------------|-------------------|
| ZYMO                      | stLFR                 | 100                | 143.04                     | 0.50              |
| ZYMO                      | ONT                   | 4,504<br>(average) | 2.48 (downsampled)         | Not needed        |
| ATCC-MSA-1003             | 10x                   | 150                | 100.38                     | 1.83              |
| ATCC-MSA-1003             | TELL-Seq              | 146                | 173.28                     | 1.89              |
| ATCC-MSA-1003             | stLFR                 | 100                | 132.95                     | 1.91              |
| ATCC-MSA-1003             | PacBio CLR            | 8,875<br>(average) | 1.27 (downsampled)         | Not needed        |
| CAMI-high                 | stLFR                 | 100                | 100.01                     | 4.57              |
| CAMI-high                 | ONT                   | 4,122<br>(average) | 7.38                       | Not needed        |
| Human gut microbiome (S1) | stLFR                 | 100                | 136.60                     | 4.08              |
| Human gut microbiome (S1) | PacBio CLR            | 8,878<br>(average) | 6.26                       | Not needed        |
| Human gut microbiome (S2) | stLFR                 | 100                | 131.59                     | 3.77              |
| Human gut microbiome (S2) | PacBio CLR            | 8,973<br>(average) | 8.39                       | Not needed        |
| Human gut microbiome (S3) | stLFR                 | 100                | 50.74                      | 3.51              |

**Supplementary Table 3.** Assembly statistics for different linked-read sequencing technologies on the ATCC-MSA-1003 mock community.

|                       | Pangaea TELL-Seq | Pangaea stLFR | Pangaea 10x |
|-----------------------|------------------|---------------|-------------|
| Total assembly length | 61,990,266       | 59,485,233    | 58,860,253  |
| Genome fraction (%)   | 82.63            | 84.43         | 83.23       |
| Longest alignment     | 4,968,123        | 2,853,278     | 58,622,163  |
| Overall N50           | 1,360,322        | 1,619,916     | 1,033,793   |
| Overall NA50          | 649,672          | 731,990       | 483,416     |
| NGA50 per strain      | 887,107          | 677,353       | 441,029     |
| NA50 per strain       | 838,457          | 628,059       | 421,157     |

**Supplementary Table 4.** The composition of the 10 strains in the ZYMO mock community.

| Organism                        | Composition |
|---------------------------------|-------------|
| <i>Listeria monocytogenes</i>   | 89.1%       |
| <i>Pseudomonas aeruginosa</i>   | 8.9%        |
| <i>Bacillus subtilis</i>        | 0.89%       |
| <i>Saccharomyces cerevisiae</i> | 0.89%       |
| <i>Escherichia coli</i>         | 0.089%      |
| <i>Salmonella enterica</i>      | 0.089%      |
| <i>Lactobacillus fermentum</i>  | 0.0089%     |
| <i>Enterococcus faecalis</i>    | 0.00089%    |
| <i>Cryptococcus neoformans</i>  | 0.00089%    |
| <i>Staphylococcus aureus</i>    | 0.000089%   |

## Supplementary Notes

### Supplementary Note 1: 10x, stLFR and TELL-Seq Sequencing

We compared the characteristics of 10x, stLFR and TELL-Seq linked-reads on the mock community. 10x linked-reads generated the lowest number of unique barcodes (2.31 million; Supplementary Table 5), where the values of stLFR and TELL-Seq were 45.38 and 16.61 million, respectively (Supplementary Table 5). We reconstructed the physical long fragments and calculated the number of fragments per barcode ( $N_{F/B}$ ) for the three technologies by mapping the linked-reads to reference genomes. 10x linked-reads had the lowest barcode specificity with  $N_{F/B}$  of 16.61 (Supplementary Table 5), where the values of stLFR and TELL-Seq linked-reads were much lower, which were 1.54 and 4.26, respectively (Supplementary Table 5). We aggregated the barcodes based on long fragments they involved and found highest fraction is 6.41% for 14 long fragments. The highest fractions for both stLFR (62.98%) and TELL-Seq (27.05%) linked-reads were matching to one long fragment (Supplementary Fig. 6).

10x and stLFR linked-reads generated comparable lengths of the long fragments, that were longer than those from TELL-Seq linked-reads (Supplementary Fig. 7); the weighted average of long fragment lengths ( $W_{\mu_{FL}}$ ) for 10x, stLFR and TELL-Seq linked-reads were 17.02Kb, 15.68Kb and 11.85Kb, respectively (Supplementary Table 5). All the three linked-read sequencing technologies had shallow depth of short-reads for long fragments, with similar distributions (Supplementary Fig. 8) and comparable average value ( $C_R$ : 10x = 0.21, stLFR = 0.20, TELL-Seq = 0.17; Supplementary Table 5).

Further, we investigated the insert sizes of linked-reads generated from the three sequencing technologies. stLFR (246 bp) and TELL-Seq (204 bp) linked-reads obtained lower median insert sizes than 10x linked-reads (339 bp). We observed the histograms of the insert sizes from stLFR and TELL-Seq linked-reads were more biased than that from 10x linked-reads, and the curve of histogram from TELL-Seq linked-reads had frequent vibrations (Supplementary Fig. 9).

**Supplementary Table 5.** The statistics of 10x, TELL-Seq and stLFR linked-reads.

|                                                 | 10x linked-reads | stLFR linked-reads | TELL-Seq linked-reads |
|-------------------------------------------------|------------------|--------------------|-----------------------|
| Number of barcodes                              | 2,305,295        | 45,381,261         | 16,609,060            |
| Number of fragments per barcode ( $N_{F/B}$ )   | 16.61            | 1.54               | 4.26                  |
| Weighted fragment length ( $W_{\mu_{FL}}$ , bp) | 17,022           | 15,683             | 11,848                |



|                                   |      |      |      |
|-----------------------------------|------|------|------|
| Read depth per fragment ( $C_R$ ) | 0.21 | 0.20 | 0.17 |
| Median insert size (bp)           | 339  | 246  | 204  |

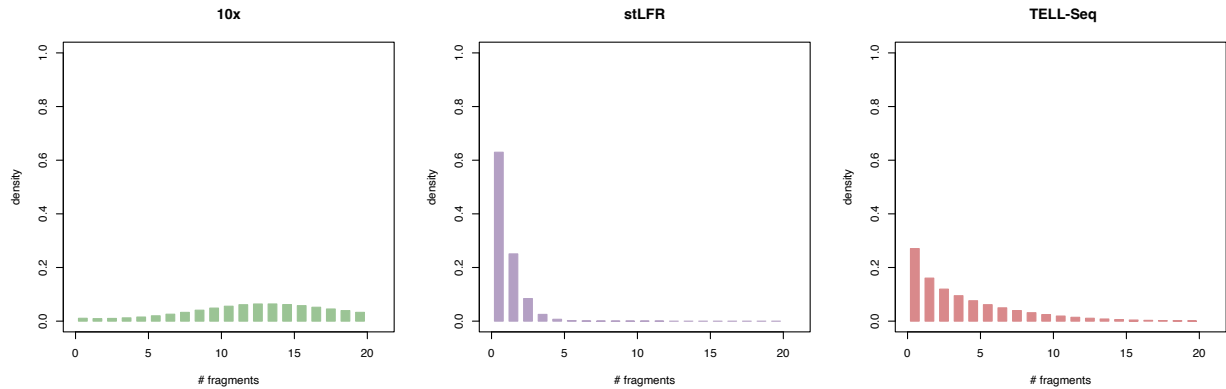

**Supplementary Figure 6.** The distributions of the number of physical long fragments per barcode.

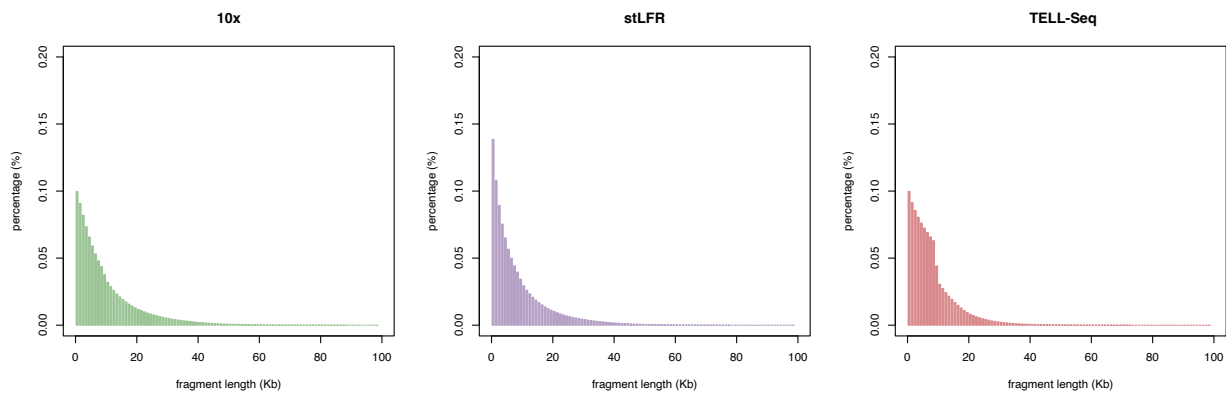

**Supplementary Figure 7.** The distributions of the lengths of physical long fragments.

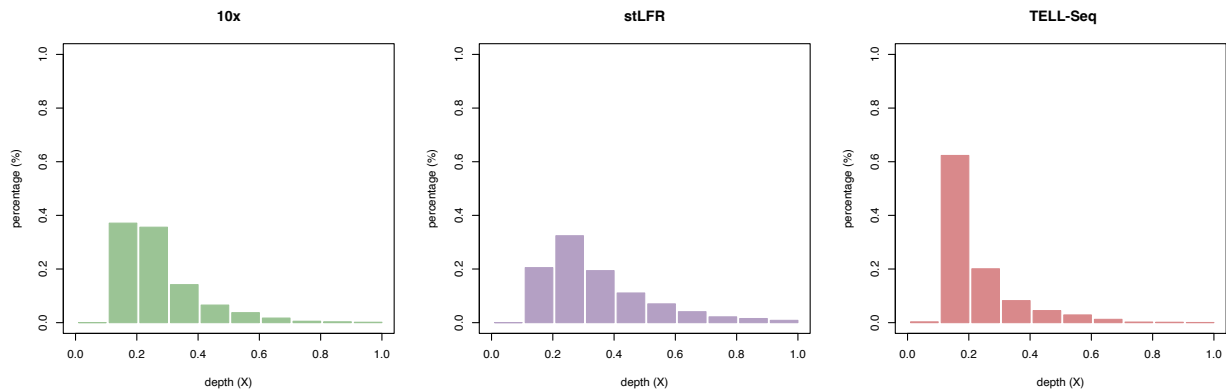

**Supplementary Figure 8.** The distributions of read depths per long fragments.

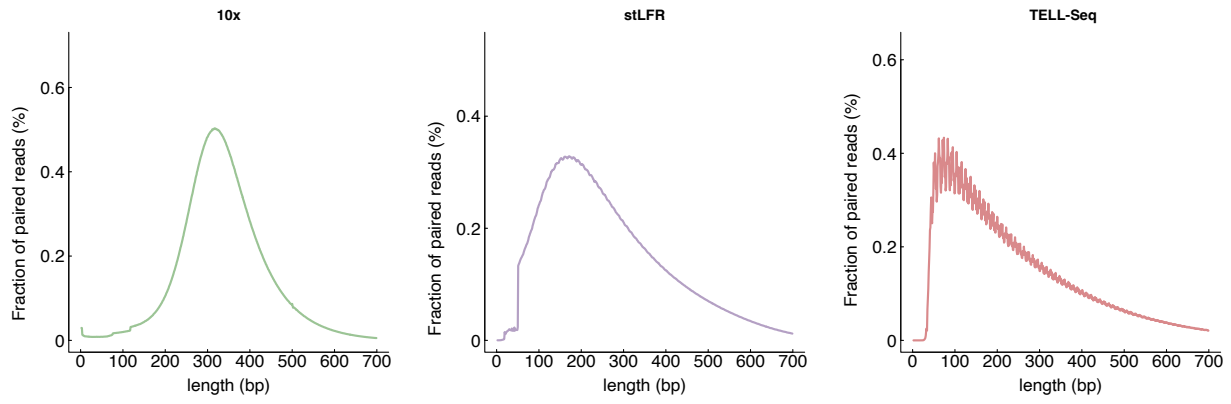

**Supplementary Figure 9.** The distributions of insert sizes for 10x, stLFR and TELL-Seq linked-reads.

## Supplementary Note 2: Read binning of Pangaea

### 1. Architecture of VAE

We used VAE to learn the low-dimensional representation of the co-barcoded linked-reads based on their abundances ( $X_A$ ) and TNF ( $X_T$ ) features (Supplementary Fig. 10). The input of VAE was the concatenation of L1-normalized  $X_A$  (400 dimensions) and  $X_T$  (136 dimensions). In the encoder, the input features were transformed by two fully connected hidden layers with 512 neurons for each, and compressed into two 32-dimensional latent parameters  $\mu$  and  $\sigma$  for Gaussian distribution. We sampled the latent embedding  $Z$  from the Gaussian distribution  $N(\mu, \sigma^2)$ . To make the sampling process trainable for  $\mu$  and  $\sigma$ , we used the reparameterization trick, that calculated  $Z$  by  $Z = \mu + \sigma \circ \epsilon, \epsilon \sim N(0, 1)$ . In the decoder, we used two fully connected hidden layers with the same settings as the encoder, and reconstructed the input features using an output layer with 516 neurons. The output vector was split to the reconstructed abundances ( $\hat{X}_A$ ) and TNF ( $\hat{X}_T$ ) features according to their corresponding dimensions. Both  $\hat{X}_A$  and  $\hat{X}_T$  were transformed by softmax before output. To increase the stability of training, each hidden layer in the encoder and decoder was followed by a batch normalization layer and a dropout layer with  $P=0.2$ . Our batch size and learning rate were set to 2,048 and 0.005. We exploited weight decay of  $1e-4$  by default to avoid overfitting and used the early stopping that stopped the training when the loss started to increase, which substantially reduced the training time.

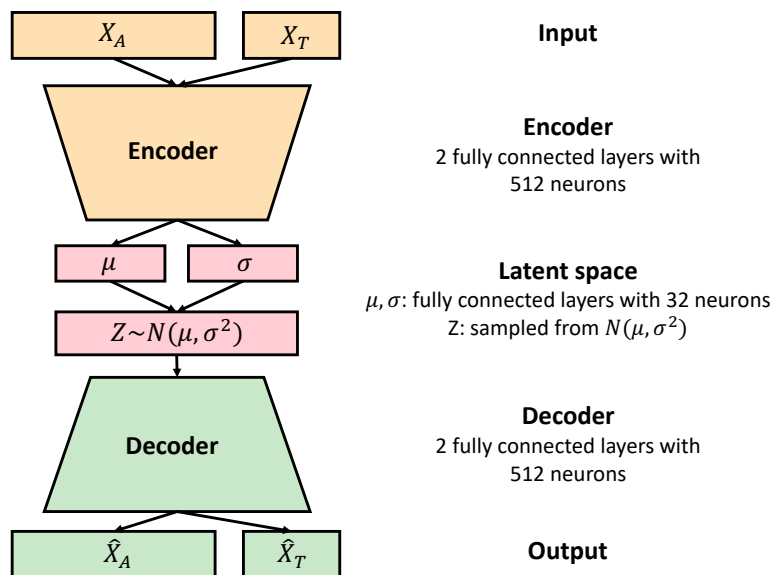

**Supplementary Figure 10.** The architecture of VAE used in Pangaea.

### 2. Comparing read binning of Pangaea with other read binning tools

As there were no available binning tools for linked-reads, we compared the VAE-based binning algorithm in Pangaea with two existing long-read binning tools, METABCC-LR (v2.0.0)<sup>1</sup>

and LRBinner (v2.1)<sup>2</sup> on ATCC-MSA-1003. In order to enable these long-read binning tools on linked-reads, the co-barcoded reads were connected using a single “N” into long-reads. As the long-read binners will skip k-mers containing N (see [code](#) in METABCC-LR; [the same](#) for LRBinner), this process will not impact the k-mer frequency of the co-barcoded reads for long-read binning tools. LRBinner failed to finish the binning task within three weeks with 100 threads, so we excluded it for further comparison. The VAE-based binning algorithm achieved a higher overall F1 score and adjusted rand index (ARI) than METABCC-LR (Pangaea: F1 = 0.6144, ARI = 0.3764; METABCC-LR: F1 = 0.5887; ARI = 0.1704; Supplementary Table 6). The VAE-based binning particularly improved the binning performance for low-abundance microbes (abundance: 0.02%), achieving an F1 score of 0.6073 and ARI of 0.4624. The performance of METABCC-LR was almost the same as that of random binning (Supplementary Table 6).

**Supplementary Table 6.** The F1 scores and ARIs of the binning algorithm of Pangaea and METABCC-LR on the stLFR linked-reads of ATCC-MSA-1003.

|                       | Binning of Pangaea | METABCC-LR |
|-----------------------|--------------------|------------|
| Number of clusters    | 15                 | 2          |
| F1 – abundance 0.02%  | 0.6073             | 0.4624     |
| ARI – abundance 0.02% | 0.3246             | 0          |
| F1 – abundance 0.18%  | 0.5125             | 0.5167     |
| ARI – abundance 0.18% | 0.0022             | 0.0140     |
| F1 – abundance 1.8%   | 0.7500             | 0.6155     |
| ARI – abundance 1.8%  | 0.5069             | 0.1740     |
| F1 – abundance 18%    | 0.5960             | 0.6351     |
| ARI – abundance 18%   | 0.3581             | 0.2019     |
| F1 - overall          | 0.6144             | 0.5887     |
| ARI - overall         | 0.3764             | 0.1704     |

## Supplementary Note 3: Parameter search of Pangaea

### 1. $\alpha$ and $\beta$ for the weights in the loss function

We searched a range of hyper-parameters  $\alpha$  and  $\beta$  on the stLFR linked-reads dataset from ATCC-MSA-1003. The overall adjusted rand index (ARI) and F1 did not vary much when changing  $\beta$ , so we used  $\beta = 0.015$  because the opposite trends in overall precision and ARI were observed after  $\beta = 0.015$  (Supplementary Fig. 11a). The lowest  $\alpha$  resulted in the highest overall precision, recall, F1, and ARI (Supplementary Fig. 11b). Therefore, we adopted a low value of  $\alpha = 0.1$ . The  $w_T$  is much larger than  $w_A$ , which means TNF is a more important feature than the  $k$ -mer histogram in read binning. This might be because the  $k$ -mer-histograms using a larger  $k$  ( $k=15$ ) than TNF ( $k=4$ ) are more likely to be influenced by sequencing errors and contain more noise. We used a small  $w_{KL}$ , which was consistent with the previous study that applies VAE in contig binning tasks<sup>3</sup>.

### 2. Thresholding T for multi-thresholding reassembly

We investigated the impact of the range of thresholds T on the final assembly results using the TELL-Seq dataset of ATCC-MSA-1003 (Supplementary Data 4). We compared the assembly results with and without the multi-thresholding reassembly. We observed  $T = \{10, 30\}$  obtained the highest N50 (1.36MB), the highest total length (61.99Mb), and the highest total length of long contigs > 10Kb (55.35Mb). Involving higher thresholds did not bring much improvement and would need a longer time to run (Supplementary Data 4).

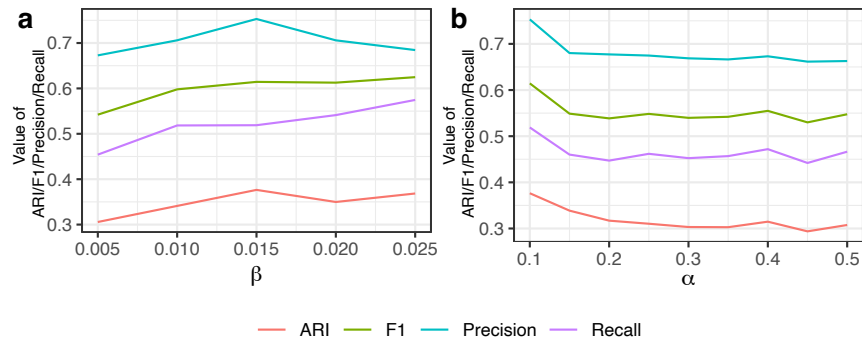

**Supplementary Figure 11.** The binning performance on the stLFR linked-reads dataset of ATCC-MSA-1003 using different parameters in the loss function of VAE. **a** Binning performance using different  $\alpha$  ( $\beta$  is fixed at 0.015). **b** Binning performance using different  $\beta$  ( $\alpha$  is fixed at 0.1).

## Supplementary Note 4: Pangaea generated more NCMAGs using linked-reads than metaFlye using PacBio long-reads

We compared contigs from Pangaea using linked-reads with the contigs produced by metaFlye using PacBio CLR long-reads on S1 and S2 (Supplementary Table 2; Supplementary Fig. 4). Although metaFlye generated contigs with higher N50s, Pangaea produced a substantially greater total assembly length for both S1 (Pangaea = 488.19Mb, metaFlye = 243.88Mb) and S2 (Pangaea = 408.82Mb, metaFlye = 256.78Mb; Supplementary Table 7).

Then we binned the assemblies using MetaBAT2 and counted the number of NCMAGs from the binning results. Pangaea generated significantly more NCMAGs than metaFlye (Pangaea = 41, metaFlye = 16; Supplementary Fig. 12a), especially those with N50s smaller than 1Mb (Pangaea = 29, metaFlye = 4; Supplementary Fig. 12b,d) and read depths lower than 300x (Pangaea = 27, metaFlye = 0; Supplementary Fig. 12c), whereas Pangaea and metaFlye obtained comparable numbers of NCMAGs with N50 larger than 1Mb (Pangaea = 12, metaFlye = 12; Supplementary Fig. 12b). Pangaea also assembled more ORF clusters (Pangaea = 522.81K, metaFlye = 169.79K), 5s rRNAs (Pangaea = 612, metaFlye = 400), 16s rRNAs (Pangaea = 690, metaFlye = 492), 23s rRNAs (Pangaea = 700, metaFlye = 491), plasmid contigs (Pangaea = 3,376, metaFlye = 218) and viral contigs (Pangaea = 1,707, metaFlye = 61) than metaFlye (Supplementary Table 8).

**Supplementary Table 7.** Assembly statistics for Pangaea and metaFlye on S1 and S2.

|                       | Human gut microbiome (S1) |             | Human gut microbiome (S2) |             |
|-----------------------|---------------------------|-------------|---------------------------|-------------|
|                       | Pangaea                   | metaFlye    | Pangaea                   | metaFlye    |
| Total assembly length | 488,785,611               | 243,883,392 | 408,819,148               | 256,776,331 |
| Largest contig        | 2,394,379                 | 3,388,254   | 2,877,256                 | 4,327,156   |
| N50                   | 64,394                    | 168,442     | 188,161                   | 239,008     |

**Supplementary Table 8.** The total number of ORF clusters, rRNAs, plasmid contigs (>1Kb), and viral contigs (>1Kb) of Pangaea and metaFlye on S1 and S2.

|                        | Pangaea | metaFlye |
|------------------------|---------|----------|
| ORF clusters           | 522,812 | 169,785  |
| 5S rRNA                | 612     | 440      |
| 16s rRNA               | 690     | 492      |
| 23s rRNA               | 700     | 491      |
| Plasmid contigs (>1Kb) | 3,376   | 218      |

|                      |       |    |
|----------------------|-------|----|
| Viral contigs (>1Kb) | 1,707 | 61 |
|----------------------|-------|----|

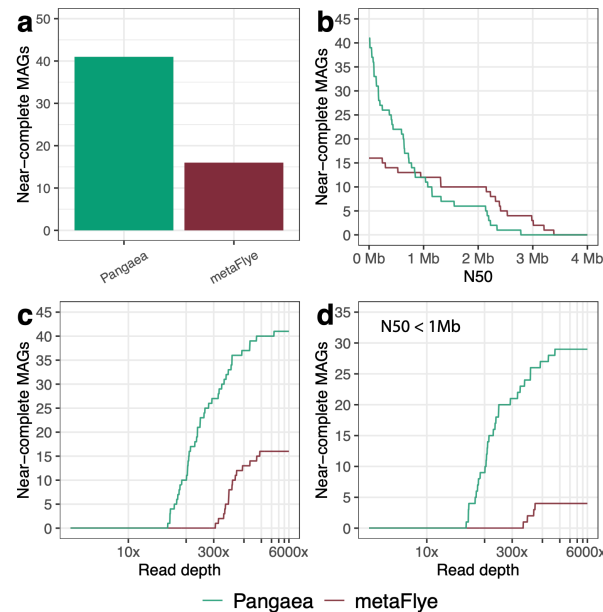

**Supplementary Figure 12.** The number of NCMAGs of Pangaea and metaFlye on S1 and S2. **a** the number of NCMAGs of Pangaea and metaFlye on S1 and S2. **b** the number of NCMAGs of Pangaea and metaFlye on S1 and S2 with a minimum value of N50. **c** the number of NCMAGs of Pangaea and metaFlye on S1 and S2 with a maximum value of read depth. **d** the number of NCMAGs (N50 < 1Mb) of Pangaea and metaFlye on S1 and S2 with a maximum value of read depth.

## References

- 1 Wickramarachchi, A., Mallawaarachchi, V., Rajan, V. & Lin, Y. Metabcc-lr: meta genomics binning by coverage and composition for long reads. *Bioinformatics* **36**, i3-i11 (2020).
- 2 Wickramarachchi, A. & Lin, Y. in *21st International Workshop on Algorithms in Bioinformatics (WABI 2021)*. (Schloss Dagstuhl-Leibniz-Zentrum für Informatik).
- 3 Nissen, J. N. et al. Improved metagenome binning and assembly using deep variational autoencoders. *Nat Biotechnol* **39**, 555-560 (2021). <https://doi.org/10.1038/s41587-020-00777-4>
